# Supplementary material
Source: PubMed Central journal article supplement (PMC10991251)
Supplement: 262_2020_2705_MOESM1_ESM.pdf [file 262_2020_2705_MOESM1_ESM.pdf]

**Supplementary Table 1.** Number of T-cell receptor repertoire/ expression microarray/ exome sequencing analyses per tumor regression grade.

|                            | <b>Tumor regression grade 1</b> | <b>Tumor regression grade 3/4</b> |
|----------------------------|---------------------------------|-----------------------------------|
|                            | <b>(n = 35)</b>                 | <b>(n = 32)</b>                   |
| T-cell receptor repertoire | 35                              | 32                                |
| Exome and microarray       | 20                              | 29                                |
| Exome without microarray   | 6                               | 3                                 |
| Microarray without exome   | 9                               | 0                                 |
