# Supplementary material
Source: PubMed Central journal article supplement (PMC10991251)
Supplement: 262_2020_2705_MOESM3_ESM.pdf [file 262_2020_2705_MOESM3_ESM.pdf]

Supplementary Table 3. Upregulated genes in TIL<sup>hi</sup> /DI<sup>hi</sup> group

| #  | Gene Symbol | Description                                      | Biological Process (GO)                                                                                                                                                                                      |
|----|-------------|--------------------------------------------------|--------------------------------------------------------------------------------------------------------------------------------------------------------------------------------------------------------------|
| 1  | ACTR3       | actin related protein 3                          | GO:0016344 meiotic chromosome movement towards spindle pole;GO:0034314 Arp2/3 complex-mediated actin nucleation;GO:0038096 Fc-gamma receptor signaling pathway involved in phagocytosis                      |
| 2  | ADGRE5      | adhesion G protein-coupled receptor E5           | GO:0043312 neutrophil degranulation;GO:0002283 neutrophil activation involved in immune response;GO:0007189 adenylate cyclase-activating G protein-coupled receptor signaling pathway                        |
| 3  | AEN         | apoptosis enhancing nuclease                     | GO:0000738 DNA catabolic process, exonucleolytic;GO:0045071 negative regulation of viral genome replication;GO:0042771 intrinsic apoptotic signaling pathway in response to DNA damage by p53 class mediator |
| 4  | AIF1        | allograft inflammatory factor 1                  | GO:0014739 positive regulation of muscle hyperplasia;GO:0071672 negative regulation of smooth muscle cell chemotaxis;GO:0071673 positive regulation of smooth muscle cell chemotaxis                         |
| 5  | ANXA5       | annexin A5                                       | GO:0002576 platelet degranulation;GO:0070588 calcium ion transmembrane transport;GO:0007596 blood coagulation                                                                                                |
| 6  | APOL1       | apolipoprotein L1                                | GO:0051838 cytolysis by host of symbiont cells;GO:0051801 cytolysis in other organism involved in symbiotic interaction;GO:0051873 killing by host of symbiont cells                                         |
| 7  | APOL2       | apolipoprotein L2                                | GO:0006953 acute-phase response;GO:0060135 maternal process involved in female pregnancy;GO:0008203 cholesterol metabolic process                                                                            |
| 8  | ARHGAP30    | Rho GTPase activating protein 30                 | GO:0043547 positive regulation of GTPase activity;GO:0051056 regulation of small GTPase mediated signal transduction;GO:0043087 regulation of GTPase activity                                                |
| 9  | ARPC5L      | actin related protein 2/3 complex subunit 5 like | GO:0034314 Arp2/3 complex-mediated actin nucleation;GO:0045010 actin nucleation;GO:0030838 positive regulation of actin filament polymerization                                                              |
| 10 | ASPM        | assembly factor for spindle microtubules         | GO:0045769 negative regulation of asymmetric cell division;GO:0021873 forebrain neuroblast division;GO:0051661 maintenance of centrosome location                                                            |

|    |          |                                             |                                                                                                                                                                                                                                        |
|----|----------|---------------------------------------------|----------------------------------------------------------------------------------------------------------------------------------------------------------------------------------------------------------------------------------------|
| 11 | BST2     | bone marrow stromal cell antigen 2          | GO:0002737 negative regulation of plasmacytoid dendritic cell cytokine production;GO:0002736 regulation of plasmacytoid dendritic cell cytokine production;GO:1901253 negative regulation of intracellular transport of viral material |
| 12 | C12orf57 | chromosome 12 open reading frame 57         | GO:0021540 corpus callosum morphogenesis;GO:0021952 central nervous system projection neuron axonogenesis;GO:0021678 third ventricle development                                                                                       |
| 13 | C1QC     | complement C1q C chain                      | GO:0045650 negative regulation of macrophage differentiation;GO:0030853 negative regulation of granulocyte differentiation;GO:0030852 regulation of granulocyte differentiation                                                        |
| 14 | CCR1     | C-C motif chemokine receptor 1              | GO:0090026 positive regulation of monocyte chemotaxis;GO:0045672 positive regulation of osteoclast differentiation;GO:0071677 positive regulation of mononuclear cell migration                                                        |
| 15 | CD3D     | CD3d molecule                               | GO:0045059 positive thymic T cell selection;GO:0045061 thymic T cell selection;GO:0043368 positive T cell selection                                                                                                                    |
| 16 | CD52     | CD52 molecule                               | GO:0007204 positive regulation of cytosolic calcium ion concentration;GO:0045730 respiratory burst;GO:0051480 regulation of cytosolic calcium ion concentration                                                                        |
| 17 | CD53     | CD53 molecule                               | GO:1901741 positive regulation of myoblast fusion;GO:1901739 regulation of myoblast fusion;GO:0060143 positive regulation of syncytium formation by plasma membrane fusion                                                             |
| 18 | CDK9     | cyclin dependent kinase 9                   | GO:1903839 positive regulation of mRNA 3'-UTR binding;GO:2001168 positive regulation of histone H2B ubiquitination;GO:1903837 regulation of mRNA 3'-UTR binding                                                                        |
| 19 | CHD3     | chromodomain helicase DNA binding protein 3 | GO:0032508 DNA duplex unwinding;GO:0043044 ATP-dependent chromatin remodeling;GO:0007098 centrosome cycle                                                                                                                              |
| 20 | CKAP2L   | cytoskeleton associated protein 2 like      |                                                                                                                                                                                                                                        |
| 21 | CKAP4    | cytoskeleton associated protein 4           | GO:0043312 neutrophil degranulation;GO:0002283 neutrophil activation involved in immune response;GO:0042119 neutrophil activation                                                                                                      |

|    |        |                                                      |                                                                                                                                                                                                              |
|----|--------|------------------------------------------------------|--------------------------------------------------------------------------------------------------------------------------------------------------------------------------------------------------------------|
| 22 | CMTM3  | CKLF like MARVEL transmembrane domain containing 3   | GO:0050861 positive regulation of B cell receptor signaling pathway;GO:0050855 regulation of B cell receptor signaling pathway;GO:0050857 positive regulation of antigen receptor-mediated signaling pathway |
| 23 | CRK    | CRK proto-oncogene, adaptor protein                  | GO:0035685 helper T cell diapedesis;GO:0035684 helper T cell extravasation;GO:1990859 cellular response to endothelin                                                                                        |
| 24 | CSF2RB | colony stimulating factor 2 receptor subunit beta    | GO:0038043 interleukin-5-mediated signaling pathway;GO:0038156 interleukin-3-mediated signaling pathway;GO:0036016 cellular response to interleukin-3                                                        |
| 25 | CTSB   | cathepsin B                                          | GO:0046697 decidualization;GO:0046718 viral entry into host cell;GO:0002224 toll-like receptor signaling pathway                                                                                             |
| 26 | CXCR6  | C-X-C motif chemokine receptor 6                     | GO:0070098 chemokine-mediated signaling pathway;GO:0007204 positive regulation of cytosolic calcium ion concentration;GO:0019079 viral genome replication                                                    |
| 27 | CYBB   | cytochrome b-245 beta chain                          | GO:1904845 cellular response to L-glutamine;GO:1904044 response to aldosterone;GO:1904844 response to L-glutamine                                                                                            |
| 28 | DDB2   | damage specific DNA binding protein 2                | GO:0035518 histone H2A monoubiquitination;GO:0006295 nucleotide-excision repair, DNA incision, 3'-to lesion;GO:0000717 nucleotide-excision repair, DNA duplex unwinding                                      |
| 29 | DDX3Y  | DEAD-box helicase 3 Y-linked                         | GO:0007276 gamete generation;GO:0019953 sexual reproduction;GO:0048609 multicellular organismal reproductive process                                                                                         |
| 30 | DOCK10 | dedicator of cytokinesis 10                          | GO:0002315 marginal zone B cell differentiation;GO:0002313 mature B cell differentiation involved in immune response;GO:0002335 mature B cell differentiation                                                |
| 31 | EIF1AY | eukaryotic translation initiation factor 1A Y-linked | GO:0006413 translational initiation;GO:0006412 translation;GO:0043043 peptide biosynthetic process                                                                                                           |
| 32 | EMC6   | ER membrane protein complex subunit 6                | GO:0000045 autophagosome assembly;GO:1905037 autophagosome organization;GO:0016236 macroautophagy                                                                                                            |

|    |         |                                                |                                                                                                                                                                                                                                               |
|----|---------|------------------------------------------------|-----------------------------------------------------------------------------------------------------------------------------------------------------------------------------------------------------------------------------------------------|
| 33 | FAM107B | family with sequence similarity 107 member B   |                                                                                                                                                                                                                                               |
| 34 | FCGR2A  | Fc fragment of IgG receptor IIa                | GO:0038096 Fc-gamma receptor signaling pathway involved in phagocytosis;GO:0002431 Fc receptor mediated stimulatory signaling pathway;GO:0038094 Fc-gamma receptor signaling pathway                                                          |
| 35 | FCGR2B  | Fc fragment of IgG receptor IIb                | GO:0001814 negative regulation of antibody-dependent cellular cytotoxicity;GO:0001797 negative regulation of type IIa hypersensitivity;GO:0002893 negative regulation of type II hypersensitivity                                             |
| 36 | FLI1    | Fli-1 proto-oncogene, ETS transcription factor | GO:0035855 megakaryocyte development;GO:0098751 bone cell development;GO:0030219 megakaryocyte differentiation                                                                                                                                |
| 37 | FLT3    | fms related receptor tyrosine kinase 3         | GO:0002328 pro-B cell differentiation;GO:0002318 myeloid progenitor cell differentiation;GO:0043552 positive regulation of phosphatidylinositol 3-kinase activity                                                                             |
| 38 | FZD2    | frizzled class receptor 2                      | GO:0090179 planar cell polarity pathway involved in neural tube closure;GO:0090178 regulation of establishment of planar polarity involved in neural tube closure;GO:0090177 establishment of planar polarity involved in neural tube closure |
| 39 | GBP1    | guanylate binding protein 1                    | GO:1900041 negative regulation of interleukin-2 secretion;GO:0050860 negative regulation of T cell receptor signaling pathway;GO:0050858 negative regulation of antigen receptor-mediated signaling pathway                                   |
| 40 | GMFG    | glia maturation factor gamma                   | GO:0034316 negative regulation of Arp2/3 complex-mediated actin nucleation;GO:0051126 negative regulation of actin nucleation;GO:0034315 regulation of Arp2/3 complex-mediated actin nucleation                                               |
| 41 | GPR34   | G protein-coupled receptor 34                  | GO:0035589 G protein-coupled purinergic nucleotide receptor signaling pathway;GO:0035590 purinergic nucleotide receptor signaling pathway;GO:0035588 G protein-coupled purinergic receptor signaling pathway                                  |
| 42 | GZMA    | granzyme A                                     | GO:0032078 negative regulation of endodeoxyribonuclease activity;GO:0032076 negative regulation of deoxyribonuclease activity;GO:0032071 regulation of endodeoxyribonuclease activity                                                         |

|    |          |                                                           |                                                                                                                                                                                           |
|----|----------|-----------------------------------------------------------|-------------------------------------------------------------------------------------------------------------------------------------------------------------------------------------------|
| 43 | HAPLN3   | hyaluronan and proteoglycan link protein 3                | GO:0001501 skeletal system development;GO:0007417 central nervous system development;GO:0007155 cell adhesion                                                                             |
| 44 | HOXB6    | homeobox B6                                               | GO:0048704 embryonic skeletal system morphogenesis;GO:0034101 erythrocyte homeostasis;GO:0048706 embryonic skeletal system development                                                    |
| 45 | HSPA7    | heat shock protein family A (Hsp70) member 7 (pseudogene) | GO:0051085 chaperone cofactor-dependent protein refolding;GO:0051084 'de novo' posttranslational protein folding;GO:0042026 protein refolding                                             |
| 46 | IGHG3    | immunoglobulin heavy constant gamma 3 (G3m marker)        | GO:0038096 Fc-gamma receptor signaling pathway involved in phagocytosis;GO:0002431 Fc receptor mediated stimulatory signaling pathway;GO:0006958 complement activation, classical pathway |
| 47 | IGHV4-31 | immunoglobulin heavy variable 4-31                        | GO:0006958 complement activation, classical pathway;GO:0050853 B cell receptor signaling pathway;GO:0002455 humoral immune response mediated by circulating immunoglobulin                |
| 48 | IGKV2-24 | immunoglobulin kappa variable 2-24                        | GO:0002377 immunoglobulin production;GO:0002440 production of molecular mediator of immune response;GO:0002250 adaptive immune response                                                   |
| 49 | IGLV1-44 | immunoglobulin lambda variable 1-44                       | GO:0038096 Fc-gamma receptor signaling pathway involved in phagocytosis;GO:0002431 Fc receptor mediated stimulatory signaling pathway;GO:0006958 complement activation, classical pathway |
| 50 | IL2RB    | interleukin 2 receptor subunit beta                       | GO:0038110 interleukin-2-mediated signaling pathway;GO:0035723 interleukin-15-mediated signaling pathway;GO:0071352 cellular response to interleukin-2                                    |
| 51 | ISG20    | interferon stimulated exonuclease gene 20                 | GO:0000738 DNA catabolic process, exonucleolytic;GO:0045071 negative regulation of viral genome replication;GO:1903901 negative regulation of viral life cycle                            |
| 52 | ITGA1    | integrin subunit alpha 1                                  | GO:0032516 positive regulation of phosphoprotein phosphatase activity;GO:0042311 vasodilation;GO:0042059 negative regulation of epidermal growth factor receptor signaling pathway        |

|    |          |                                               |                                                                                                                                                                                                                                                                          |
|----|----------|-----------------------------------------------|--------------------------------------------------------------------------------------------------------------------------------------------------------------------------------------------------------------------------------------------------------------------------|
| 53 | KDM5D    | lysine demethylase 5D                         | GO:0034721 histone H3-K4 demethylation, trimethyl-H3-K4-specific;GO:0034720 histone H3-K4 demethylation;GO:0060765 regulation of androgen receptor signaling pathway                                                                                                     |
| 54 | LAPTM5   | lysosomal protein transmembrane 5             | GO:1990830 cellular response to leukemia inhibitory factor;GO:1990823 response to leukemia inhibitory factor;GO:0071345 cellular response to cytokine stimulus                                                                                                           |
| 55 | LCP1     | lymphocyte cytosolic protein 1                | GO:0071803 positive regulation of podosome assembly;GO:0044319 wound healing, spreading of cells;GO:0035722 interleukin-12-mediated signaling pathway                                                                                                                    |
| 56 | LCP2     | lymphocyte cytosolic protein 2                | GO:0038095 Fc-epsilon receptor signaling pathway;GO:0050852 T cell receptor signaling pathway;GO:0038093 Fc receptor signaling pathway                                                                                                                                   |
| 57 | LEPROTL1 | leptin receptor overlapping transcript like 1 | GO:2000009 negative regulation of protein localization to cell surface;GO:0032511 late endosome to vacuole transport via multivesicular body sorting pathway;GO:2000008 regulation of protein localization to cell surface                                               |
| 58 | LRRC73   | leucine rich repeat containing 73             |                                                                                                                                                                                                                                                                          |
| 59 | MAP7D1   | MAP7 domain containing 1                      | GO:0000226 microtubule cytoskeleton organization;GO:0007017 microtubule-based process;GO:0007010 cytoskeleton organization                                                                                                                                               |
| 60 | MMP9     | matrix metalloproteinase 9                    | GO:2000697 negative regulation of epithelial cell differentiation involved in kidney development;GO:2001268 negative regulation of cysteine-type endopeptidase activity involved in apoptotic signaling pathway;GO:0051549 positive regulation of keratinocyte migration |
| 61 | MRPS21   | mitochondrial ribosomal protein S21           | GO:0070126 mitochondrial translational termination;GO:0070125 mitochondrial translational elongation;GO:0006415 translational termination                                                                                                                                |
| 62 | MS4A6A   | membrane spanning 4-domains A6A               |                                                                                                                                                                                                                                                                          |
| 63 | MSANTD3  | Myb/SANT DNA binding domain containing 3      |                                                                                                                                                                                                                                                                          |

|    |          |                                                                    |                                                                                                                                                                                                                                           |
|----|----------|--------------------------------------------------------------------|-------------------------------------------------------------------------------------------------------------------------------------------------------------------------------------------------------------------------------------------|
| 64 | MYL6     | myosin light chain 6                                               | GO:0030049 muscle filament sliding;GO:0033275 actin-myosin filament sliding;GO:0070252 actin-mediated cell contraction                                                                                                                    |
| 65 | NCALD    | neurocalcin delta                                                  | GO:0003073 regulation of systemic arterial blood pressure;GO:0008217 regulation of blood pressure;GO:0019722 calcium-mediated signaling                                                                                                   |
| 66 | NINJ1    | ninjurin 1                                                         | GO:1990384 hyaloid vascular plexus regression;GO:0001954 positive regulation of cell-matrix adhesion;GO:0060033 anatomical structure regression                                                                                           |
| 67 | NMI      | N-myc and STAT interactor                                          | GO:0045355 negative regulation of interferon-alpha biosynthetic process;GO:0045358 negative regulation of interferon-beta biosynthetic process;GO:1902524 positive regulation of protein K48-linked ubiquitination                        |
| 68 | P2RY13   | purinergic receptor P2Y13                                          | GO:0035589 G protein-coupled purinergic nucleotide receptor signaling pathway;GO:0007194 negative regulation of adenylate cyclase activity;GO:0035590 purinergic nucleotide receptor signaling pathway                                    |
| 69 | PAFAH1B1 | platelet activating factor acetylhydrolase 1b regulatory subunit 1 | GO:0021819 layer formation in cerebral cortex;GO:0021540 corpus callosum morphogenesis;GO:0021801 cerebral cortex radial glia guided migration                                                                                            |
| 70 | PARP8    | poly(ADP-ribose) polymerase family member 8                        | GO:0070213 protein auto-ADP-ribosylation;GO:0006471 protein ADP-ribosylation;GO:0030968 endoplasmic reticulum unfolded protein response                                                                                                   |
| 71 | PFN1     | profilin 1                                                         | GO:0051497 negative regulation of stress fiber assembly;GO:1900029 positive regulation of ruffle assembly;GO:0001843 neural tube closure                                                                                                  |
| 72 | PHPT1    | phosphohistidine phosphatase 1                                     | GO:0050860 negative regulation of T cell receptor signaling pathway;GO:2000984 negative regulation of ATP citrate synthase activity;GO:0035774 positive regulation of insulin secretion involved in cellular response to glucose stimulus |
| 73 | PIGC     | phosphatidylinositol glycan anchor biosynthesis class C            | GO:0016254 preassembly of GPI anchor in ER membrane;GO:0006506 GPI anchor biosynthetic process;GO:0006505 GPI anchor metabolic process                                                                                                    |
| 74 | PLS3     | plastin 3                                                          | GO:0051639 actin filament network formation;GO:0051017 actin filament bundle assembly;GO:0061572 actin filament bundle organization                                                                                                       |

|    |                 |                                                           |                                                                                                                                                                                                                                                                 |
|----|-----------------|-----------------------------------------------------------|-----------------------------------------------------------------------------------------------------------------------------------------------------------------------------------------------------------------------------------------------------------------|
| 75 | PSMB6           | proteasome 20S subunit beta 6                             | GO:0002223 stimulatory C-type lectin receptor signaling pathway;GO:0002479 antigen processing and presentation of exogenous peptide antigen via MHC class I, TAP-dependent;GO:0002220 innate immune response activating cell surface receptor signaling pathway |
| 76 | PTPRC           | protein tyrosine phosphatase receptor type C              | GO:0048304 positive regulation of isotype switching to IgG isotypes;GO:0048302 regulation of isotype switching to IgG isotypes;GO:1905451 positive regulation of Fc-gamma receptor signaling pathway involved in phagocytosis                                   |
| 77 | RAC2            | Rac family small GTPase 2                                 | GO:0090023 positive regulation of neutrophil chemotaxis;GO:0060753 regulation of mast cell chemotaxis;GO:1903955 positive regulation of protein targeting to mitochondrion                                                                                      |
| 78 | RAP1B           | RAP1B, member of RAS oncogene family                      | GO:2000301 negative regulation of synaptic vesicle exocytosis;GO:1902804 negative regulation of synaptic vesicle transport;GO:0045955 negative regulation of calcium ion-dependent exocytosis                                                                   |
| 79 | RASGRP1         | RAS guanyl releasing protein 1                            | GO:0033089 positive regulation of T cell differentiation in thymus;GO:0032825 positive regulation of natural killer cell differentiation;GO:1902715 positive regulation of interferon-gamma secretion                                                           |
| 80 | RBMXL1          | RBMX like 1                                               | GO:0048026 positive regulation of mRNA splicing, via spliceosome;GO:0050685 positive regulation of mRNA processing;GO:0033120 positive regulation of RNA splicing                                                                                               |
| 81 | RNASEK          | ribonuclease K                                            | GO:0090502 RNA phosphodiester bond hydrolysis, endonucleolytic;GO:0090501 RNA phosphodiester bond hydrolysis;GO:0090305 nucleic acid phosphodiester bond hydrolysis                                                                                             |
| 82 | RNASEK-C17orf49 | RNASEK-C17orf49 readthrough                               |                                                                                                                                                                                                                                                                 |
| 83 | RORA            | RAR related orphan receptor A                             | GO:0021702 cerebellar Purkinje cell differentiation;GO:0072539 T-helper 17 cell differentiation;GO:0021694 cerebellar Purkinje cell layer formation                                                                                                             |
| 84 | SAMSN1          | SAM domain, SH3 domain and nuclear localization signals 1 | GO:0050869 negative regulation of B cell activation;GO:0050732 negative regulation of peptidyl-tyrosine phosphorylation;GO:0002820 negative regulation of adaptive immune response                                                                              |



|    |           |                                                                             |                                                                                                                                                                                                                       |
|----|-----------|-----------------------------------------------------------------------------|-----------------------------------------------------------------------------------------------------------------------------------------------------------------------------------------------------------------------|
| 85 | SGK1      | serum/glucocorticoid regulated kinase 1                                     | GO:0070294 renal sodium ion absorption;GO:0003096 renal sodium ion transport;GO:0060453 regulation of gastric acid secretion                                                                                          |
| 86 | SKA1      | spindle and kinetochore associated complex subunit 1                        | GO:0031110 regulation of microtubule polymerization or depolymerization;GO:0031109 microtubule polymerization or depolymerization;GO:0070507 regulation of microtubule cytoskeleton organization                      |
| 87 | SLC15A3   | solute carrier family 15 member 3                                           | GO:0035672 oligopeptide transmembrane transport;GO:0006857 oligopeptide transport;GO:1902600 proton transmembrane transport                                                                                           |
| 88 | SLC2A3    | solute carrier family 2 member 3                                            | GO:0019852 L-ascorbic acid metabolic process;GO:0043312 neutrophil degranulation;GO:1904659 glucose transmembrane transport                                                                                           |
| 89 | SSU72     | SSU72 homolog, RNA polymerase II CTD phosphatase                            | GO:0070940 dephosphorylation of RNA polymerase II C-terminal domain;GO:0006369 termination of RNA polymerase II transcription;GO:0006378 mRNA polyadenylation                                                         |
| 90 | TARP      | TCR gamma alternate reading frame protein                                   |                                                                                                                                                                                                                       |
| 91 | TCIRG1    | T cell immune regulator 1, ATPase H <sup>+</sup> transporting V0 subunit a3 | GO:0097188 dentin mineralization;GO:0090383 phagosome acidification;GO:0035711 T-helper 1 cell activation                                                                                                             |
| 92 | TMEM45A   | transmembrane protein 45A                                                   |                                                                                                                                                                                                                       |
| 93 | TMSB10    | thymosin beta 10                                                            | GO:0042989 sequestering of actin monomers;GO:0030837 negative regulation of actin filament polymerization;GO:0032272 negative regulation of protein polymerization                                                    |
| 94 | TNFRSF10A | TNF receptor superfamily member 10a                                         | GO:0036462 TRAIL-activated apoptotic signaling pathway;GO:0007250 activation of NF-kappaB-inducing kinase activity;GO:1902042 negative regulation of extrinsic apoptotic signaling pathway via death domain receptors |
| 95 | TPM3      | tropomyosin 3                                                               | GO:0030049 muscle filament sliding;GO:0033275 actin-myosin filament sliding;GO:0070252 actin-mediated cell contraction                                                                                                |

|     |         |                                                     |                                                                                                                                                                                                                            |
|-----|---------|-----------------------------------------------------|----------------------------------------------------------------------------------------------------------------------------------------------------------------------------------------------------------------------------|
| 96  | NCOR2   | nuclear receptor corepressor 2                      | GO:1903799 negative regulation of production of miRNAs involved in gene silencing by miRNA;GO:0060766 negative regulation of androgen receptor signaling pathway;GO:0060965 negative regulation of gene silencing by miRNA |
| 97  | TRAJ17  | T cell receptor alpha joining 17                    |                                                                                                                                                                                                                            |
| 98  | TRAV20  | T cell receptor alpha variable 20                   | GO:0002250 adaptive immune response;GO:0006955 immune response;GO:0002376 immune system process                                                                                                                            |
| 99  | TRBC1   | T cell receptor beta constant 1                     | GO:0006958 complement activation, classical pathway;GO:0050853 B cell receptor signaling pathway;GO:0050852 T cell receptor signaling pathway                                                                              |
| 100 | TRBV19  | T cell receptor beta variable 19                    | GO:0002250 adaptive immune response;GO:0006955 immune response;GO:0007166 cell surface receptor signaling pathway                                                                                                          |
| 101 | TRBV7-2 | T cell receptor beta variable 7-2                   | GO:0002250 adaptive immune response;GO:0006955 immune response;GO:0007166 cell surface receptor signaling pathway                                                                                                          |
| 102 | TRDV2   | T cell receptor delta variable 2                    | GO:0002377 immunoglobulin production;GO:0002440 production of molecular mediator of immune response;GO:0002250 adaptive immune response                                                                                    |
| 103 | EIPR1   | EARP complex and GARP complex interacting protein 1 | GO:1905281 positive regulation of retrograde transport, endosome to Golgi;GO:2001137 positive regulation of endocytic recycling;GO:1905279 regulation of retrograde transport, endosome to Golgi                           |
| 104 | TXLNGY  | taxilin gamma pseudogene, Y-linked                  |                                                                                                                                                                                                                            |
| 105 | VAMP8   | vesicle associated membrane protein 8               | GO:1903595 positive regulation of histamine secretion by mast cell;GO:1903593 regulation of histamine secretion by mast cell;GO:0043308 eosinophil degranulation                                                           |
| 106 | RAB6D   | RAB6D, member RAS oncogene family                   | GO:0006891 intra-Golgi vesicle-mediated transport;GO:0006890 retrograde vesicle-mediated transport, Golgi to ER;GO:0042147 retrograde transport, endosome to Golgi                                                         |
| 107 | ZC3H12C | zinc finger CCCH-type containing 12C                | GO:0090305 nucleic acid phosphodiester bond hydrolysis;GO:0090304 nucleic acid metabolic                                                                                                                                   |

|     |        |                            |                                                                        |
|-----|--------|----------------------------|------------------------------------------------------------------------|
|     |        |                            | process;GO:0006139 nucleobase-containing compound<br>metabolic process |
| 108 | ZNF618 | zinc finger protein<br>618 |                                                                        |
